# Supplementary material for: Fine-tuning anti-tumor immunotherapies via stochastic simulations
Source: Springer Nature journal article supplement (doi:10.1186/1471-2105-13-s4-s8), 2012-03-28
Supplement: 12859_2012_5105_MOESM1_ESM.pdf [file 12859_2012_5105_MOESM1_ESM.pdf]

# Fine-tuning anti-tumor immunotherapies via stochastic simulations: Supplementary Materials

Giulio Caravagna<sup>1</sup>, Roberto Barbuti<sup>2</sup>, Alberto d'Onofrio<sup>3,\*</sup>

<sup>1</sup>Institute for Informatics and Telematics, National Research Council, Via. G. Moruzzi 1, Pisa, 56127, Italy.

<sup>2</sup>Dipartimento di Informatica, Università di Pisa, Largo Pontecorvo 3, Pisa, 56127, Italy.

<sup>3</sup>Department of Experimental Oncology, European Institute of Oncology, Via Ripamonti 435, Milano, 20141, Italy.

Email: Giulio Caravagna - giulio.caravagna@iit.cnr.it; Roberto Barbuti - barbuti@di.unipi.it; Alberto d'Onofrio\* - alberto.donofrio@ifom-ieo-campus.it;

\*Corresponding author

## Supplementary Materials Scalar differential inequalities

Consider the following initial values problem

$$\begin{aligned} x' &= f(x, t), \\ x(0) &= x_0 \end{aligned} \quad (1)$$

with  $x_0 \geq 0$  and let  $Q$ , with  $x(0) \in Q$ , be a positively invariant set for (1), i.e. such that for all  $t > 0$  it is  $x(t) \in Q$ . Let  $g(x, t)$  be a function such that

$$f(x, t) > g(x, t)$$

in  $Q$ , and let it be

$$\begin{aligned} y' &= g(y, t), \\ y(0) &= y_0 \end{aligned} \quad (2)$$

with  $y_0 \geq 0$  and such that  $Q$  is positively invariant also for (2). Thus it holds that for all  $t > 0$  it is

$$x(t) > y(t).$$

## Scalar linear ODE with periodic coefficients

Consider the following linear scalar ODE

$$x' = a(t)x, \quad (3)$$

where  $a(t)$  is bounded and periodic with period  $P$ . From Fourier's theorem it follows that  $a(t) = \langle a(t) \rangle + b(t)$  where  $b(t)$  is a bounded periodic function with zero mean. This yields that

$$x(t) = x(0) \exp \left( \langle a(t) \rangle t + \int_0^t b(s) ds \right)$$

and thus, from  $x(nP) = x(0) \exp(\langle a(t) \rangle Pn)$ , it follows that  $x(t) \rightarrow +\infty$  if  $\langle a(t) \rangle > 0$ , and  $x(t) \rightarrow 0$  otherwise.

## Impulsive differential equations

Consider the following equation

$$x' = -kx + \sum_0^{N_e} q_i \delta(t - \theta_i) \quad (4)$$

where  $N_e \leq +\infty$ ,  $k > 0$  and  $q_i > 0$  and consider the equivalent linear impulsive differential equation [?, ?]

$$\begin{aligned} x' &= -kx \\ x(\theta_i^+) &= x(\theta_i^-) + q_i \end{aligned} \quad (5)$$

since for  $\theta_i < t < \theta_{i+1}$  it is  $x(t) = x(\theta_i^+) e^{-k(t-\theta_i)}$ . We define the auxiliary variable  $X_i = x(\theta_i^+)$ , whose dynamics is ruled by the following discrete dynamical system

$$X_{i+1} = e^{-k(\theta_{i+1}-\theta_i)} X_i + q_i.$$

When  $N_e = +\infty$ ,  $\theta_n = nP$  and the doses  $q_i$  are all equal, i.e.  $q_i = q$  for any  $i$ , one has  $X_{i+1} = e^{-kP} X_i + q$  and hence

$$X_i = X_\infty + (X_0 - X_\infty) e^{-kPi} \quad (6)$$

where  $X_\infty = \frac{q}{1 - e^{-kP}}$ . Then, for large times  $x(t)$  tends to

$$x(t) = \frac{qe^{-k(t \bmod P)}}{1 - e^{-kP}}. \quad (7)$$

Similarly, in the case where  $k$  is not a constant but a periodic function  $k(t)$  with period  $P$  it holds that

$$x(t) = \frac{qe^{-K(t \bmod P)}}{1 - e^{-K(P)}} \quad (8)$$

where  $K(t) = \int_0^t k(s)ds$ .

### Combined impulsive immunotherapies

Here we shall briefly study the local stability of a combination therapy between ACI impulsive and IL impulsive. Uniquely to simplify the calculations we consider the special case of contemporary administration, i.e. synchronous therapies where for any  $i$

$$\theta_i^{ACI} = \theta_i^{IL} = iP.$$

When all the therapy sessions share the same injection rate of the drug, i.e.  $w_i = w$ , after some calculations one can show that

$$\varepsilon_\infty(t) = \frac{wF(t \bmod P)}{1 - e^{-\mu_E P} \left( \frac{Q + g_E}{Qe^{-\mu_I P} + g_E} \right)^{\frac{p_E}{\mu_I}}}$$

where

$$F(t) = e^{-\mu_E t} \left( \frac{Q + g_E}{Qe^{-\mu_I t} + g_E} \right)^{\frac{p_E}{\mu_I}} \quad Q = \frac{u}{1 - e^{-\mu_I P}}.$$

The average value of  $\varepsilon_\infty(t)$  reads as

$$\langle \varepsilon_\infty \rangle = \frac{w(1 + g_E/Q)^{p_E/\mu_I}}{1 - e^{-\mu_E P} \left( \frac{Q + g_E}{Qe^{-\mu_I P} + g_E} \right)^{\frac{p_E}{\mu_I}}} \frac{\xi_1}{\mu_E P}$$

where

$$\xi_1 = \int_{e^{-\mu_E P}}^1 dz \left( z^{\mu_I/\mu_E} + \frac{g_E}{Q} \right)^{-p_E/\mu_I} \quad z = e^{-\mu_E t}.$$

Although very cumbersome, the above integral is analytically calculable since

$$\int \frac{dz}{(z^m + g)^r} = \frac{(z^m + g)^{1-r}}{g} \text{Hyp}_{2,1}(\gamma_1, \gamma_2, \gamma_3, \gamma_4)$$

where  $\gamma_1 = 1$ ,  $\gamma_2 = 1 - r + \frac{1}{m}$ ,  $\gamma_3 = 1 + \frac{1}{m}$ ,  $\gamma_4 = \frac{-z^m}{g}$  and  $\text{Hyp}_{2,1}$  is the Gauss hypergeometric function  ${}_pF_q$  of order  $(p, q) = (2, 1)$  [?].
